# Supplementary material for: The use of exome capture RNA-seq for highly degraded RNA with application to clinical cancer sequencing
Source: HighWire-hosted journal article supplement (doi:10.1101/gr.189621.115), 2015-08-07
Supplement: Supplemental_Methods.docx [file Supplemental_Methods.docx]

**capture and poly(A) RNA-seq library preparation protocols**

Start optimally with 1-3µg of total RNA (the protocol has worked with as low as 100ng of input RNA from FFPE, which may require an increase in the number of PCR cycles), test RIN for poly(A) RNA-seq it has to be above 6.

***0. (for poly(A) RNA-seq only) oligo dT selection***

Follow the manufacturer’s instructions.

***1. RNA fragmentation (for poly(A) take half of the reagents)***

1. Pre-mix (per sample):

16-ul 5x First-strand buffer (Life Technologies)

2-ul Random primer (3-ug/ul) (Life Technologies)

1. Add 18-ul of pre-mix to each PCR tube
2. Add 32-ul of total RNA (0.5-3 ug) to each tube
3. Incubate at 85˚C for 1-10 minutes, depending on RNA quality. Cool down to 4˚C.

***2. First-strand cDNA synthesis (for poly(A) take half of the reagents)***

Mix the following reagents:

50.0 ul Fragmented RNA

8.0 ul 100mM DTT

1.6 ul 25mM dNTP

1.0 ul RNaseOut

1.6 ul Actinomycin D (2.5 ug/ul)

13.8 ul ddH2O

4.0 ul SuperScript II RT

Incubate in a Thermal cycler:

25˚C, 10 min

42˚C, 50 min

70˚C, 10 min

4˚C, Hold

***3. Purify first-strand cDNA with AMPure RNAclean beads (Beckman Coulter/Agencourt)***

Follow the manufacturer’s instructions.

***4. Second-strand cDNA synthesis***

1. Mix the following reagents

50 ul First-strand cDNA

10 ul 10x NEB buffer #2

1.2 ul 25mM dG+dA+dU+dC mix

32.8 ul ddH2O

1 ul RNase H

5 ul DNA polymerase I

1. Incubate at 16˚C for 2.5 hrs.

***5. Purify double-stranded cDNA with AMPure beads (Beckman Coulter/Agencourt)***

Follow the manufacturer’s instructions.

***6. Perform End Repair***

1. Mix the following reagents

50.0 ul Material from the previous step

27.4 ul ddH2O

10.0 ul 10x End-repair buffer

1.6 ul 25 mM dNTP

5 ul T4 DNA polymerase

1 ul Klenow DNA polymerase

5 ul T4 PNK

1. Incubate at 20˚C for 30 min

***7. Purify blunt-ended DNA with AMPure beads***

Follow the manufacturer’s instructions.

***8. Add A-bases to the 3’end of DNA fragments***

1. Mix the following reagents

30 ul Material from the previous step

11 ul ddH2O

5 ul 10x A-tailing buffer

1 ul 10 mM dATP

3 ul Klenow Exo polymerase

1. Incubate at 37˚C for 30 min.

***9. Purify DNA fragments with AMPure beads***

Follow the manufacturer’s instructions.

***10. Ligate adaptors to DNA fragments (40-ul rx)***

1. Mix the following reagents in 1.5-ml eppendorf tubes

21 ul Material from the previous step

25 ul 2x Rapid ligase buffer (NEB)

2 ul Index Adaptor (NEB)

2 ul Quick ligase (NEB)

1. Incubate at room temperature for 15 min.

***11. Purify DNA fragments with AMPure beads***

Follow the manufacturer’s instructions.

***12. Size selection by 3% agarose gel***

1. Load the samples on 3% agarose gel.
2. Run the gel at 65V for 1.5 hr.
3. Excise gel slices around 350 bp region.
4. Purify the DNA fragment with QIAEXII kit (0.9 ml buffer+10-ul beads; Qiagen).
5. Elute DNA in 63-ul Tris buffer.
6. Spin and transfer 60-ul for PCR.

***13. Uridine digestion and enrichment of the purified cDNA fragments by PCR (120-ul reaction)***

1. Mix the following reagents

24 ul 5x Phusion buffer

2.4 ul USER enzyme

1.2 ul 25 mM dNTP

27.6 ul ddH2O

Add 55.2-ul of the mixture to 60-ul eluted DNA.

Add 4.8-ul of (Index primer mix) to each sample.

1. PCR conditions:

37˚C 15 min (for UNG treatment)

98˚C 30 sec

65˚C 3 min (pause and add 1-ul DNA polymerase)

98˚C 10 sec

65˚C 30 sec

72˚C 30 sec

(repeat steps 3-5 for 11 cycles)

72˚C 5 min

4˚C Hold

***14. Purify PCR products by AMPure beads***

1. Follow the manufacturer’s instructions for AMPure purification.
2. Elute DNA in 25-ul of 5 mM Tris, pH8.
3. Transfer 24-ul to new tubes.
4. Measure DNA concentration on Nanodrop.
5. Analyze the libraries on a Bioanalyzer.
6. Take 1ug for exome capture.

***The following steps are only for capture RNA-seq libraries.***

***15. Hybridize to Agilent Human All exon v4 probes***

Follow the manufacturer’s instructions.

***16. Post-hybridization wash***

Follow the manufacturer’s instructions. At the end, resuspend beads in 90 ul ddH2O.

***17. PCR enrichment of captured DNA***

1. Mix the following reagents for each reaction:

Beads with DNA 90 ul

5x Phusion buffer 30 ul

Index primer mix 6 ul

25 mM dNTP 1.5 ul

ddH2O 22.5 ul

Aliquot 75-ul of the mixture in each PCR tube.

1. PCR conditions:

98˚C 30 sec

65˚C 3 min (pause and add 1.5-ul Phusion DNA polymerase)

98˚C 10 sec

65˚C 30 sec

72˚C 40 sec + 5 sec per cycle

(Total = 9 cycles)

72˚C 5 min

10˚C Hold

1. Purify PCR products by AMPure beads:
2. Follow the manufacturer’s instructions for AMPure purification.
3. Elute DNA in 25-ul of 5 mM Tris, pH8.
4. Quantify 1-ul of the libraries on Nanodrop.
5. Analyze the libraries on a Bioanalyzer.
6. Ready for Illumina sequencing.
